# Supplementary material for: Secondary polarization in electrorheological phenomenon
Source: Royal Society of Chemistry journal article supplement (doi:10.1039/c6ra22307a), 2016-01-01
Supplement: c6ra22307a1.pdf [file c6ra22307a1.pdf]

## Supporting Information

# Secondary Polarization in Electrorheological Phenomenon

*Xiaosong Guo, Xiaoguang Yu, Yulu Chen, Zijia Feng, Qinglin Li, Zhenheng Sun, Guicun Li,  
Chuncheng Hao\*, Qingquan Lei*

Laboratory of Functional and Biological Nanomaterials, College of Materials Science and  
Engineering, Qingdao University of Science and Technology, Qingdao, Shandong 266061,  
China

\*E-mail: [clx@qust.edu.cn](mailto:clx@qust.edu.cn).

Fax: 86-532-84022814. Tel: 86-532-84022632

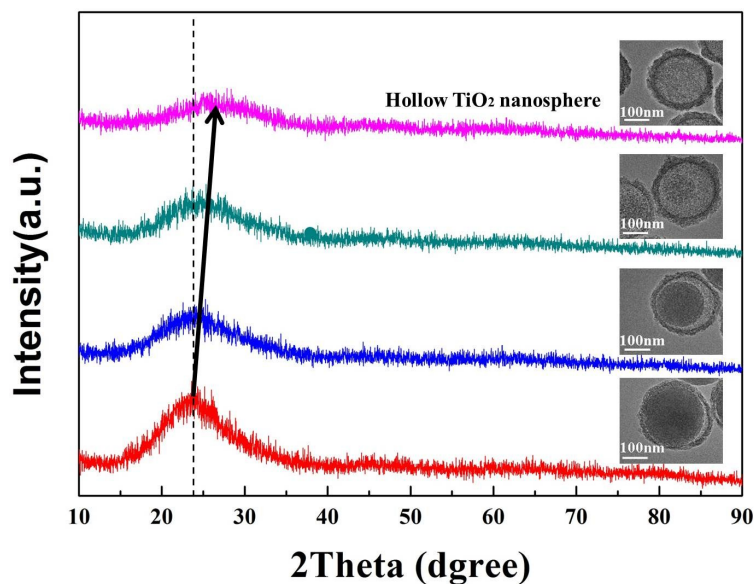

**Figure S1.** XRD of hollow TiO<sub>2</sub> nanospheres with different size of SiO<sub>2</sub> core.

Figure S1 shows the XRD of synthesized hollow TiO<sub>2</sub> nanospheres with different size of SiO<sub>2</sub> core. No characteristic peak is detected, indicating that both the SiO<sub>2</sub> and TiO<sub>2</sub> are amorphous. The broad peak around 23° gradually shifts to 26° (the broad peak of amorphous TiO<sub>2</sub>), which is attributed to the decrease of silica content in SiO<sub>2</sub>/TiO<sub>2</sub> composites. With the increasing content of TiO<sub>2</sub>, the broad peak of amorphous TiO<sub>2</sub> at 26° becomes more prominent.

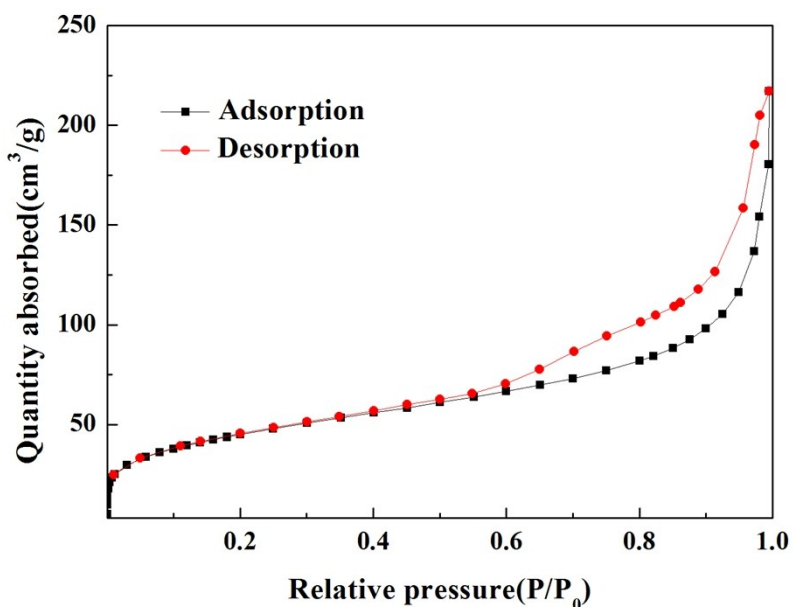

**Figure S2.** Nitrogen adsorption and desorption isotherms of the hollow TiO<sub>2</sub> nanospheres.

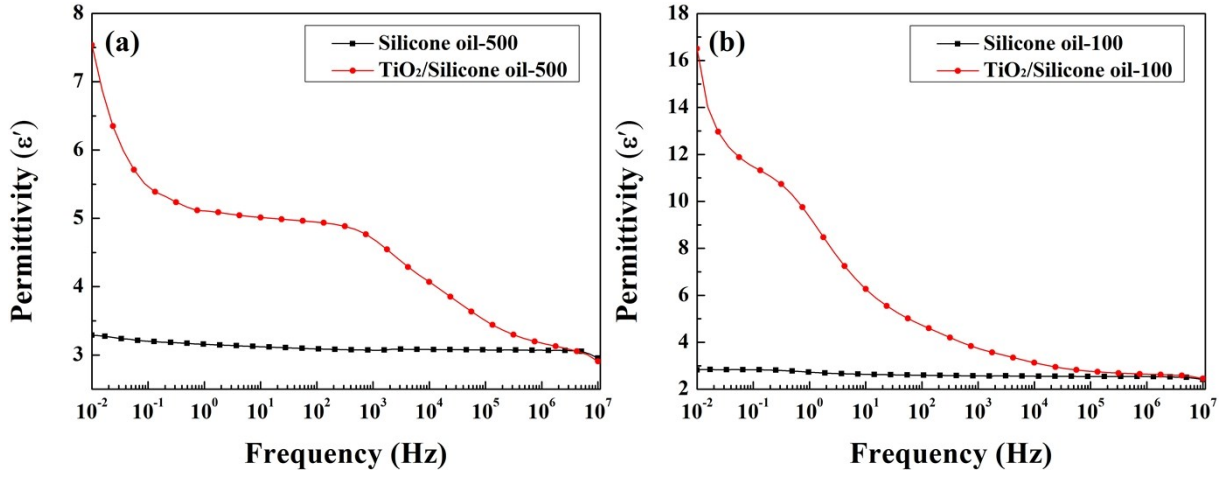

**Figure S3.** Permittivity ( $\epsilon'$ ) as a function of frequency for (a) ER fluid-500 and pure silicone-500; (b) ER fluid-100 and pure silicone-100.

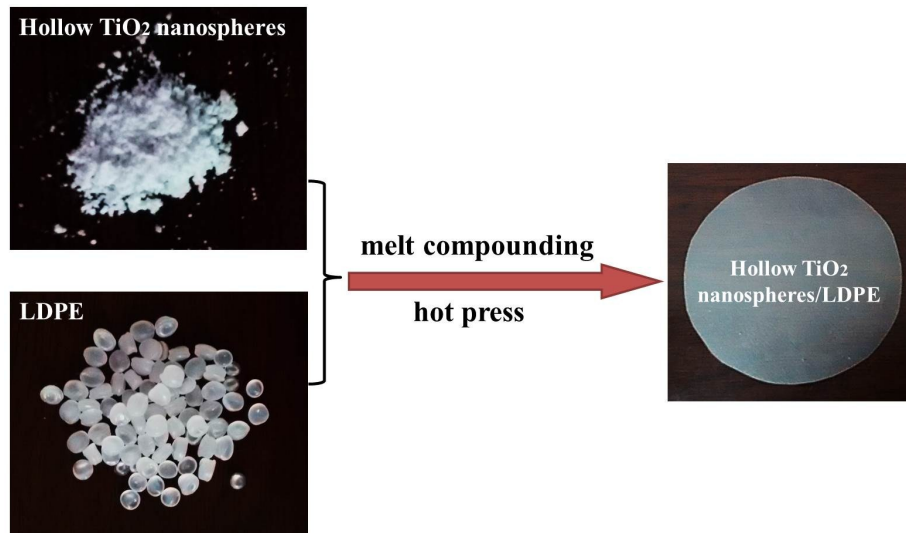

**Figure S4.** The photographs of hollow  $\text{TiO}_2$  nanospheres, LDPE and hollow  $\text{TiO}_2$  nanospheres/LDPE composite and the schematic of the formation of hollow  $\text{TiO}_2$  nanospheres/LDPE composite.

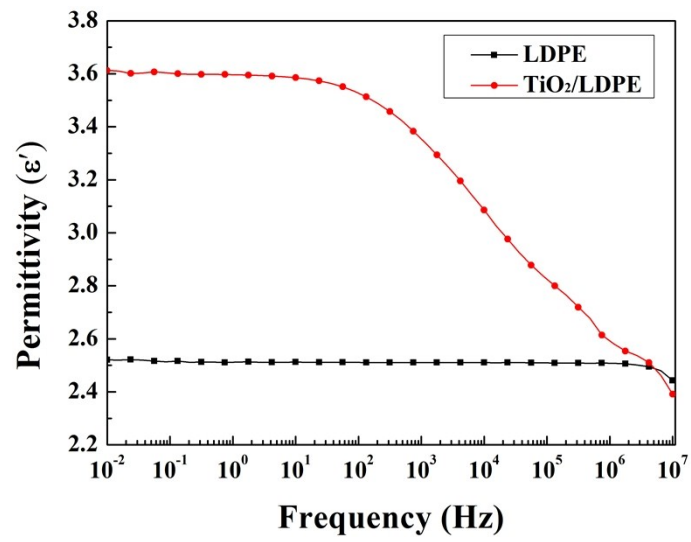

**Figure S5.** Permittivity ( $\epsilon'$ ) as a function of frequency for pure LDPE and TiO<sub>2</sub>/LDPE.
